# Supplementary material
Source: PubMed Central journal article supplement (PMC4510160)
Supplement: AEM.00822-15_zam999116488so1.pdf [file AEM.00822-15_zam999116488so1.pdf]

1 SUPPLEMENTAL MATERIAL

2

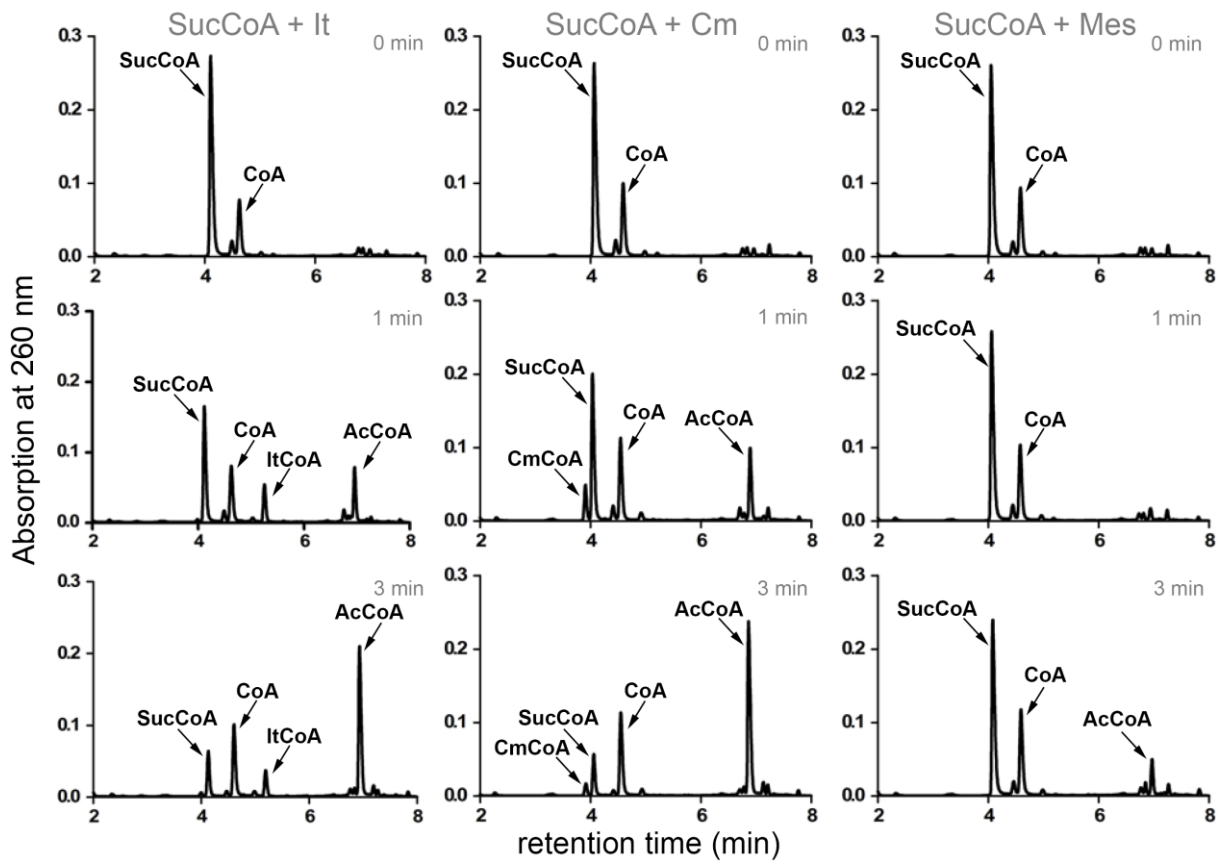

3

4 **Fig. S1.** Analysis of the products of succinyl-CoA dependent itaconate, citramalate and  
5 mesaconate conversions in cell extracts of itaconate-grown *B. xenovorans*. The samples were  
6 analyzed by reverse-phase C<sub>18</sub> UPLC to follow CoA esters (at 260 nm). The reaction mixture  
7 contained 1.5 mg protein ml<sup>-1</sup> in the assay. It, itaconate; Cm, (*S*)-citramalate; Mes,  
8 mesaconate; SucCoA, succinyl-CoA; ItCoA, itaconyl-CoA; CmCoA, (*S*)-citramalyl-CoA;  
9 AcCoA, acetyl-CoA.

10

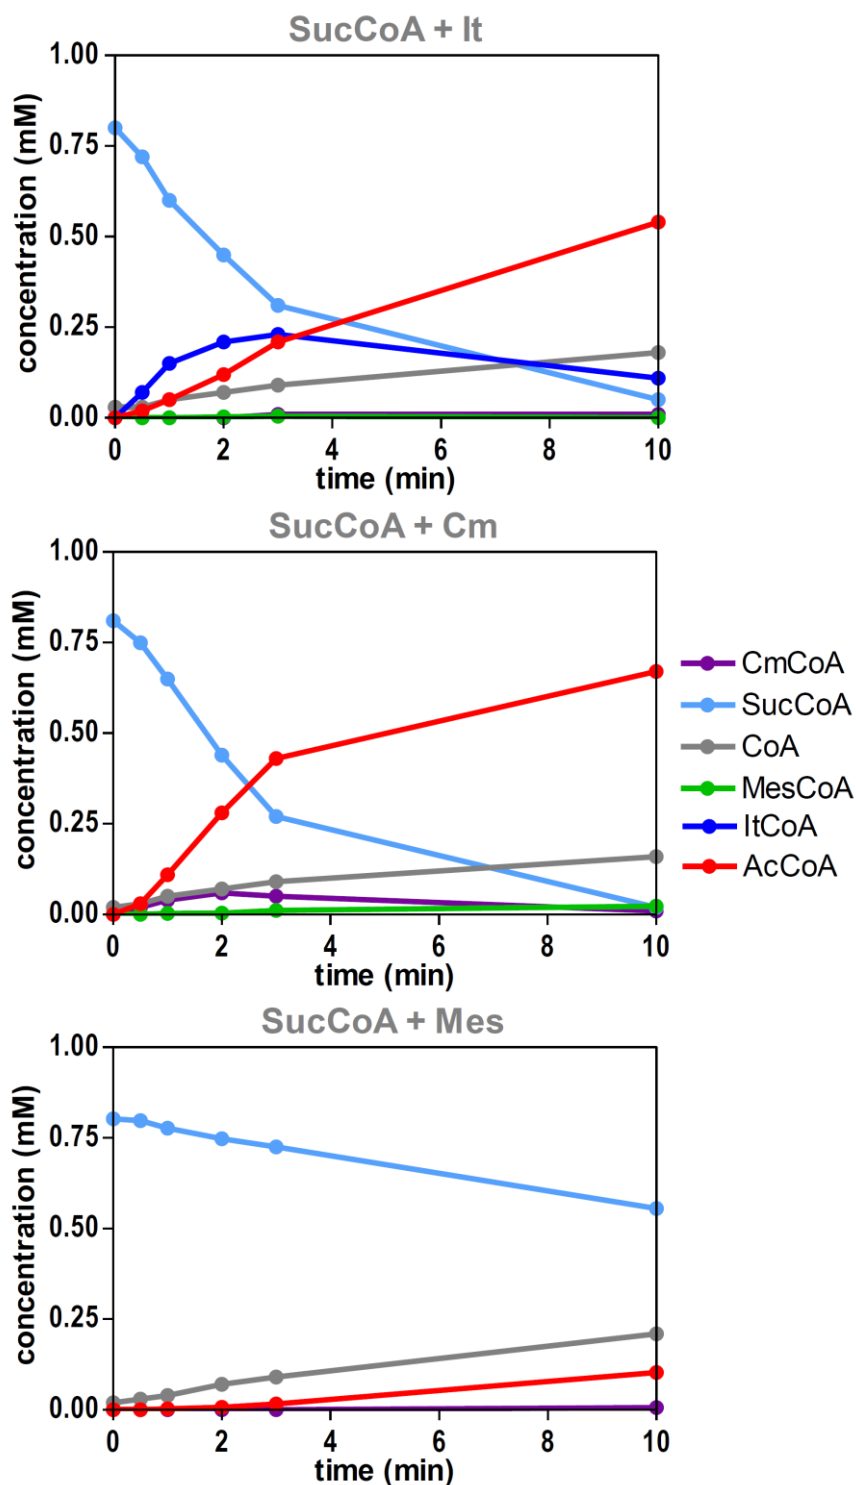

11  
 12 **Fig. S2.** Time-course of succinyl-CoA conversion and CoA-ester formation in the presence of  
 13 itaconate, (*S*)-citramalate and mesaconate in cell extracts of **itaconate-grown** *B. xenovorans*.  
 14 The reaction mixture contained 0.67 mg protein ml<sup>-1</sup>. SucCoA, succinyl-CoA; It, itaconate;  
 15 Cm, (*S*)-citramalate; Mes, mesaconate; CmCoA, (*S*)-citramalyl-CoA; MesCoA, mesaconyl-  
 16 C4-CoA; ItCoA, itaconyl-CoA; AcCoA, acetyl-CoA.

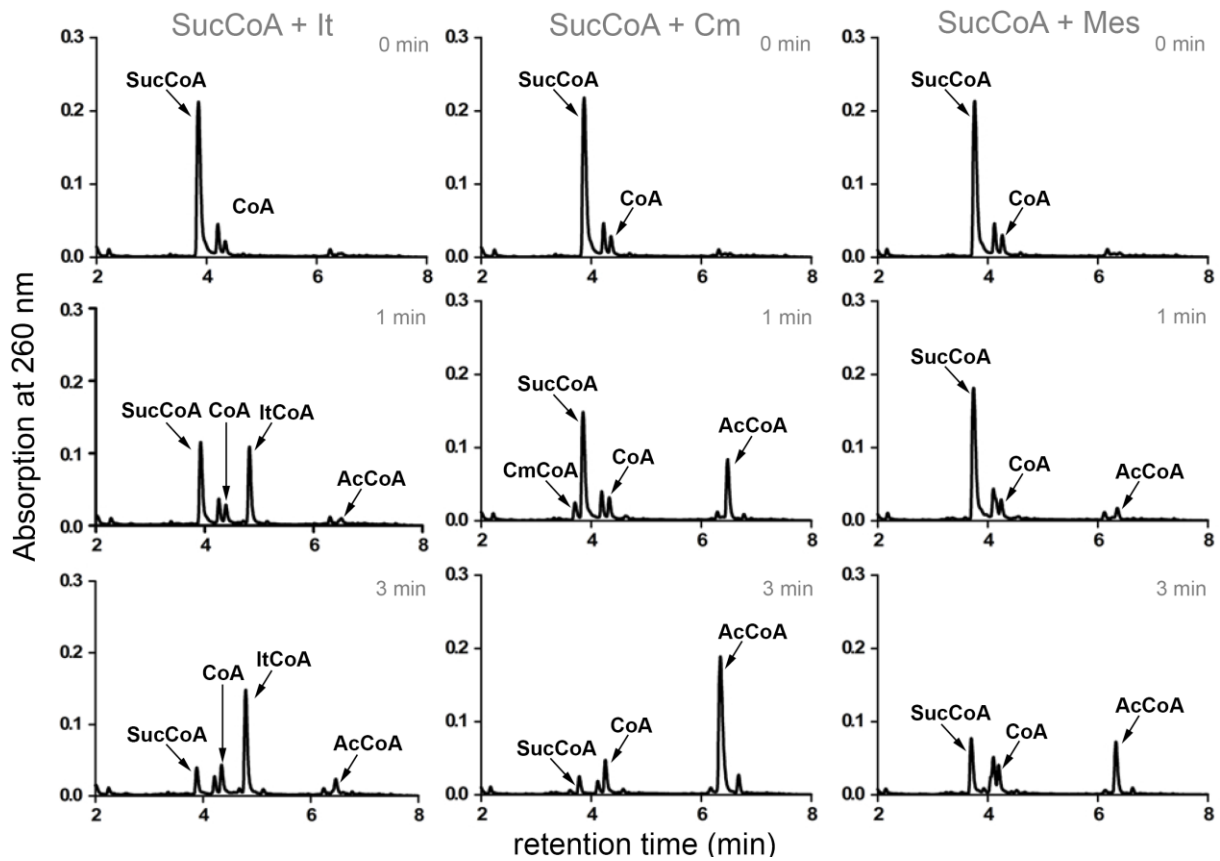

17

18 **Fig. S3.** Analysis of the products of succinyl-CoA dependent itaconate, citramalate and  
 19 mesaconate conversions in cell extracts of mesaconate-grown *B. xenovorans*. The samples  
 20 were analyzed by reverse-phase C<sub>18</sub> UPLC to follow CoA esters (at 260 nm). The reaction  
 21 mixture contained 1.4 mg protein ml<sup>-1</sup> in the assay. It, itaconate; Cm, (*S*)-citramalate; Mes,  
 22 mesaconate; SucCoA, succinyl-CoA; ItCoA, itaconyl-CoA; CmCoA, (*S*)-citramalyl-CoA;  
 23 AcCoA, acetyl-CoA.

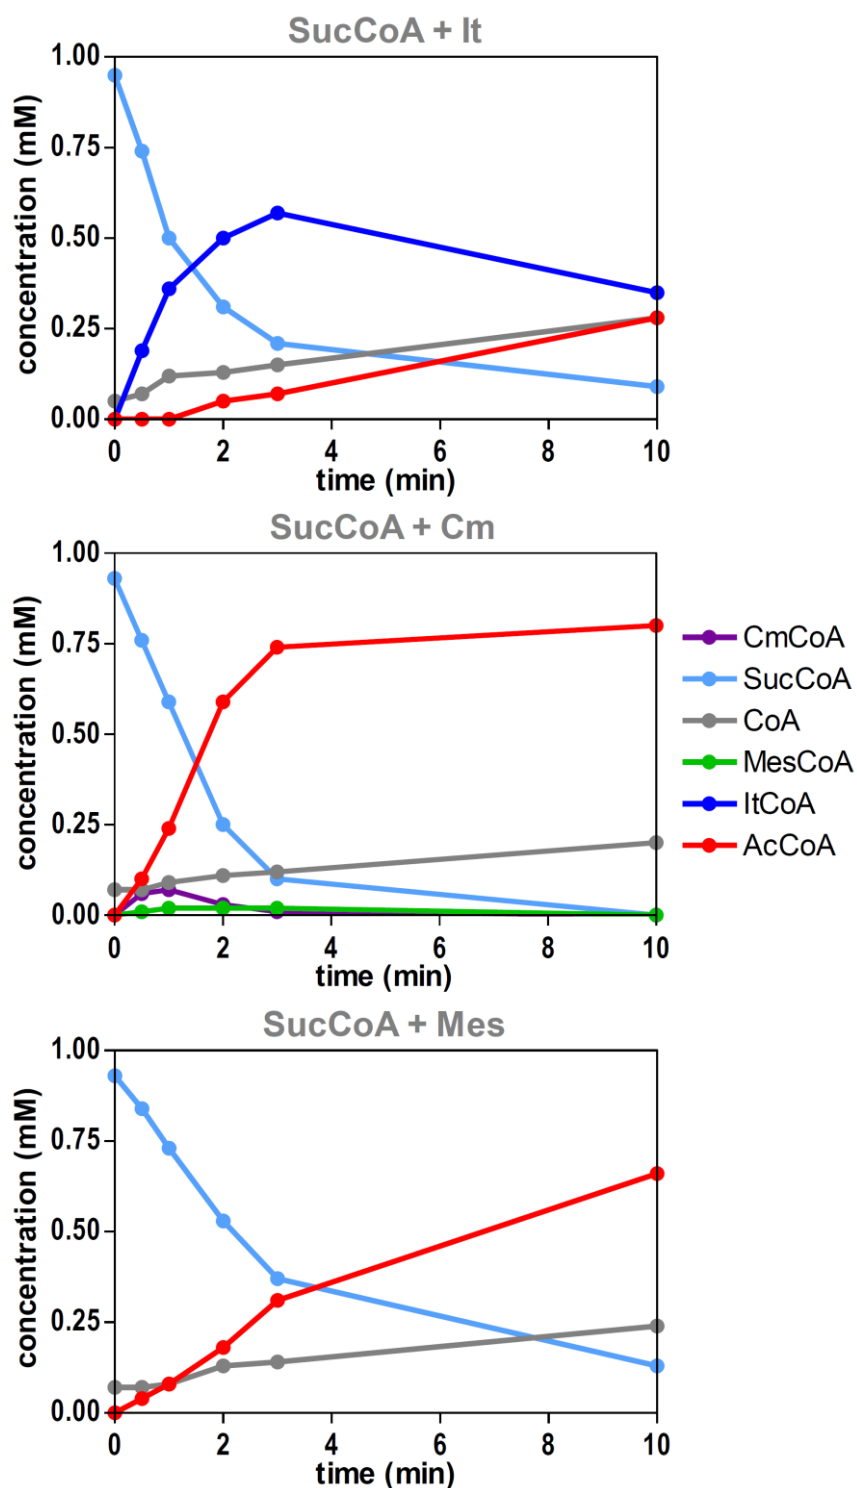

24

25 **Fig. S4.** Time-course of succinyl-CoA conversion and CoA-ester formation in the presence of  
 26 itaconate, (S)-citramalate and mesaconate in cell extracts of **mesaconate-grown B.**  
 27 *xenovorans*. The reaction mixture contained 1.4 mg protein ml<sup>-1</sup>. SucCoA, succinyl-CoA; It,  
 28 itaconate; Cm, (S)-citramalate; Mes, mesaconate; CmCoA, (S)-citramalyl-CoA; MesCoA,  
 29 mesaconyl-C4-CoA; ItCoA, itaconyl-CoA; AcCoA, acetyl-CoA.

30

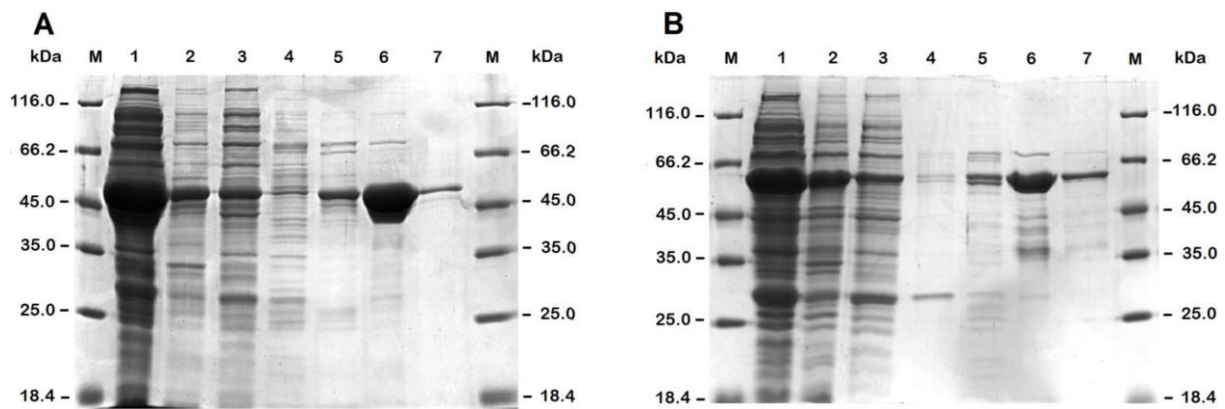

31

32

33 **Fig. S5.** SDS-PAGE (12.5%) of fractions obtained during purification of recombinant  
34 fumarate hydratase Bxe\_A1038 (**A**) and Bxe\_A3136 (**B**) from *B. xenovorans*. Lane 1,  
35 molecular mass standard proteins; lane 2, cell extract of *E. coli* producing the corresponding  
36 proteins; lane 3, flow through after Ni-NTA column; lane 4, elution with 25 mM imidazole;  
37 lane 5, elution with 50 mM imidazole; lane 6, elution with 300 mM imidazole; lane 7, elution  
38 with 500 mM imidazole. The fraction eluted with 300 mM imidazole was used for the  
39 following enzyme characterization. Proteins were stained with Coomassie blue. The predicted  
40 molecular mass of Bxe\_A1038 is 49.7 kDa, that of Bxe\_A3136 55.9 kDa.

41
